# Supplementary material
Source: PubMed Central journal article supplement (PMC9058237)
Supplement: NIHMS1789174-supplement-7.pdf [file NIHMS1789174-supplement-7.pdf]

# Figure S7

|               |     |        |           |         |         |         |          |         |          |         |        |          |          |     |     |
|---------------|-----|--------|-----------|---------|---------|---------|----------|---------|----------|---------|--------|----------|----------|-----|-----|
| G51           | 147 | VHLI   | H-NI-QF   | N       | G       | Q-VEIFF | EDTIKREG | TNLHVR  | SKSDIAYI | VYSGTIG | NKGTMI | EHKGIS   | LKVEFENS | LV  | 220 |
| fruitfly      | 145 | DAGR   | P-QGPR    | STELVA  | KSLQAGS | NL      | LSEMLG   | GNDDHAI | VYSGI    | QKVR    | PHESTL | NRQWATIE | PF       | 221 |     |
| S.mansoni     | 211 | YDFI   | Y-DDHND   | NKMSDLS | DNNS    | SLRKL   | SNDFFI   | IGNLQ   | KLTFQ    | LFQ     | VYVY   | IKMLK    | SKYVS    | 353 |     |
| S.haematobium | 219 | YDFI   | Y-DDHND   | NKMSDLS | DNNS    | SLRKL   | SNDFFI   | IGNLQ   | KLTFQ    | LFQ     | VYVY   | IKMLK    | SKYVS    | 353 |     |
| S.japonicum   | 243 | YDFH   | Y-DDHND   | NKMSDLS | DNNS    | SLRKL   | SNDFFI   | IGNLQ   | KLTFQ    | LFQ     | VYVY   | IKMLK    | SKYVS    | 305 |     |
| planarian     | 142 | DILL   | 3-DNLS    | Q       | NENEI   | TLKRF   | SNDFFI   | IGNLQ   | NEKTFQ   | SDIK    | VYVY   | IKMLK    | SKYVS    | 272 |     |
| tapeworm      | 142 | DILL   | 3-DNLS    | Q       | NENEI   | TLKRF   | SNDFFI   | IGNLQ   | NEKTFQ   | SDIK    | VYVY   | IKMLK    | SKYVS    | 272 |     |
| ameioid       | 161 | AEV    | 5-DNLS    | T       | WDL     | LD      | Y        | WDL     | LD       | Y       | WDL    | LD       | Y        | 207 |     |
| ameioid       | 131 | AEV    | 5-DNLS    | T       | WDL     | LD      | Y        | WDL     | LD       | Y       | WDL    | LD       | Y        | 207 |     |
| rotifer       | 176 | PDSR   | K-TN-AM   | G       | DA      | AKES    | ADIFAE   | EL      | CGS      | BP      | WPH    | SCGL     | NR       | 197 |     |
| cnidarian     | 131 | AAQR   | K-OT-DL   | T       | SYOL    | LN      | SCG      | AV      | PHAL     | NRL     | YOMSR  | PE       | F        | 209 |     |
| hemichordate  | 147 | CVEMGR | VQO-IQ-SE | KRPD    | F       | PS      | DDVED    | DI      | YQSF     | H       | DT     | YQSF     | H        | 209 |     |
| G51           | 221 | TE     | K-DR      | LCQEA   | LS      | EDAS    | MEMA     | LT      | EAS      | YL      | IL     | KDT      | IN       | FE  | 221 |
| fruitfly      | 221 | TE     | NEA       | SVF     | ALS     | EDAS    | MEMA     | LT      | EAS      | YL      | IL     | KDT      | IN       | FE  | 221 |
| S.mansoni     | 354 | NSNT   | SVR-R     | GLAK    | TAWG    | ADAT    | EL       | ESCL    | AG       | VV      | PGCS   | AC       | SEK      | SV  | 491 |
| S.haematobium | 354 | NSNT   | SVR-R     | GLAK    | TAWG    | ADAT    | EL       | ESCL    | AG       | VV      | PGCS   | AC       | SEK      | SV  | 491 |
| S.japonicum   | 393 | SSNI   | SVK-R     | GLAK    | TAWG    | ADAT    | EL       | ESCL    | AG       | VV      | PGCS   | AC       | SEK      | SV  | 501 |
| planarian     | 293 | SSNI   | SVK-R     | GLAK    | TAWG    | ADAT    | EL       | ESCL    | AG       | VV      | PGCS   | AC       | SEK      | SV  | 448 |
| tapeworm      | 208 | AGT    | E         | DRCC    | MSSP    | LVDS    | LT       | EL      | TP       | FR      | PI     | IL       | LT       | 324 |     |
| ameioid       | 208 | AGT    | E         | DRCC    | MSSP    | LVDS    | LT       | EL      | TP       | FR      | PI     | IL       | LT       | 324 |     |
| rotifer       | 198 | QE     | K-D       | ICL     | TSLS    | EDAS    | MEMA     | LT      | EAS      | YL      | IL     | KDT      | IN       | FE  | 370 |
| cnidarian     | 210 | EQ     | N-EMCS    | SNV     | EDAS    | MEMA    | LT       | EAS     | YL       | IL      | KDT    | IN       | FE       | 370 |     |
| hemichordate  | 238 | TS     | E-DVCG    | SSLS    | EDAS    | MEMA    | LT       | EAS     | YL       | IL      | KDT    | IN       | FE       | 370 |     |
| G51           | 331 | TWAT   | P--       | KE      | T       | GH      | SV       | PI      | GA       | P       | QNT    | LY       | V        | DE  | 306 |
| fruitfly      | 331 | TWAT   | P--       | KE      | T       | GH      | SV       | PI      | GA       | P       | QNT    | LY       | V        | DE  | 306 |
| S.mansoni     | 492 | TLVFR  | SE        | LDV     | K       | HT      | KV       | Y       | CG       | L       | ER     | NE       | K        | S   | 415 |
| S.haematobium | 502 | TLVFR  | SE        | LDV     | K       | HT      | KV       | Y       | CG       | L       | ER     | NE       | K        | S   | 415 |
| S.japonicum   | 531 | TCVFR  | NEL       | DV      | K       | HT      | KV       | Y       | CG       | L       | ER     | NE       | K        | S   | 638 |
| planarian     | 349 | COTLY  | S         | INDV    | R       | MNS     | Q        | ST      | Y        | CG      | L      | ER       | NE       | 401 |     |
| tapeworm      | 368 | TA     | S         | FD      | S       | KEE     | S        | KAA     | I        | Q       | ST     | Y        | CG       | 449 |     |
| ameioid       | 325 | AS     | INF       | S       | LED     | E       | KRS      | V       | GD       | H       | L      | A        | K        | 382 |     |
| rotifer       | 323 | CE     | IF        | D       | S       | H       | GL       | Y       | DR       | L       | S      | 3        | MY       | 387 |     |
| cnidarian     | 331 | MY     | SKN       | P       | LAV     | D       | Y        | DR      | L        | S       | 3      | MY       | SKN      | 399 |     |
| hemichordate  | 380 | TS     | EY        | K       | K       | D       | D        | V       | D        | V       | D      | V        | D        | 469 |     |
| G51           | 397 | FVDP   | FV--      | P       | CE      | K       | LV       | K       | T        | G       | QAR    | W        | --       | 497 |     |
| fruitfly      | 416 | FLEP   | LA        | VE      | K       | Y       | A        | R       | V        | R       | T      | G        | D        | 521 |     |
| S.mansoni     | 639 | V      | ES        | CEN     | N       | S       | S        | K       | E        | I       | F      | M        | P        | 772 |     |
| S.haematobium | 639 | V      | ES        | CEN     | N       | S       | S        | K       | E        | I       | F      | M        | P        | 772 |     |
| S.japonicum   | 674 | K      | E         | F       | C       | R       | N        | E       | N        | L       | T      | S        | I        | 816 |     |
| planarian     | 402 | CL     | A         | F       | Q       | T       | G        | D       | V        | F       | I      | 4        | DR       | 497 |     |
| tapeworm      | 450 | L      | S         | R       | N       | L       | M        | K       | S        | P       | C      | R        | L        | 563 |     |
| ameioid       | 383 | E      | L         | E       | R       | M       | G        | D       | L        | F       | I      | 4        | DR       | 473 |     |
| rotifer       | 388 | N      | L         | K       | N       | K       | F        | I       | P        | T       | D      | N        | Q        | 486 |     |
| cnidarian     | 400 | F      | N         | P       | F       | N       | G        | L       | K        | K       | F      | E        | T        | 502 |     |
| hemichordate  | 470 | F      | L         | P       | N       | T       | F        | Y       | H        | P       | Q      | H        | T        | 580 |     |
| G51           | 498 | Y      | M         | P       | S       | V       | I        | Q       | L        | B       | K      | M        | P        | 528 |     |
| fruitfly      | 522 | Y      | M         | P       | S       | V       | I        | Q       | L        | B       | K      | M        | P        | 528 |     |
| S.mansoni     | 773 | Y      | L         | S       | P       | T       | F        | I       | N        | D       | H      | I        | P        | 809 |     |
| S.haematobium | 773 | Y      | L         | S       | P       | T       | F        | I       | N        | D       | H      | I        | P        | 809 |     |
| S.japonicum   | 817 | Y      | L         | S       | P       | T       | F        | I       | N        | D       | H      | I        | P        | 853 |     |
| planarian     | 498 | V      | C         | L       | B       | R       | L        | E       | Y        | K       | S      | I        | Q        | 548 |     |
| tapeworm      | 564 | F      | L         | H       | V       | I       | F        | E       | V        | P       | T      | F        | L        | 600 |     |
| ameioid       | 474 | Y      | M         | P       | S       | V       | I        | Q       | L        | B       | K      | M        | P        | 510 |     |
| rotifer       | 487 | Y      | A         | I       | P       | T       | R        | E       | I        | T       | T      | E        | Y        | 576 |     |
| cnidarian     | 503 | F      | M         | P       | K       | I       | L        | F       | L        | D       | T      | M        | P        | 540 |     |
| hemichordate  | 581 | F      | T         | I       | P       | T       | I        | P       | V        | B       | E      | F        | L        | 736 |     |
