# Supplementary material
Source: PubMed Central journal article supplement (PMC9058237)

**Figure S1**

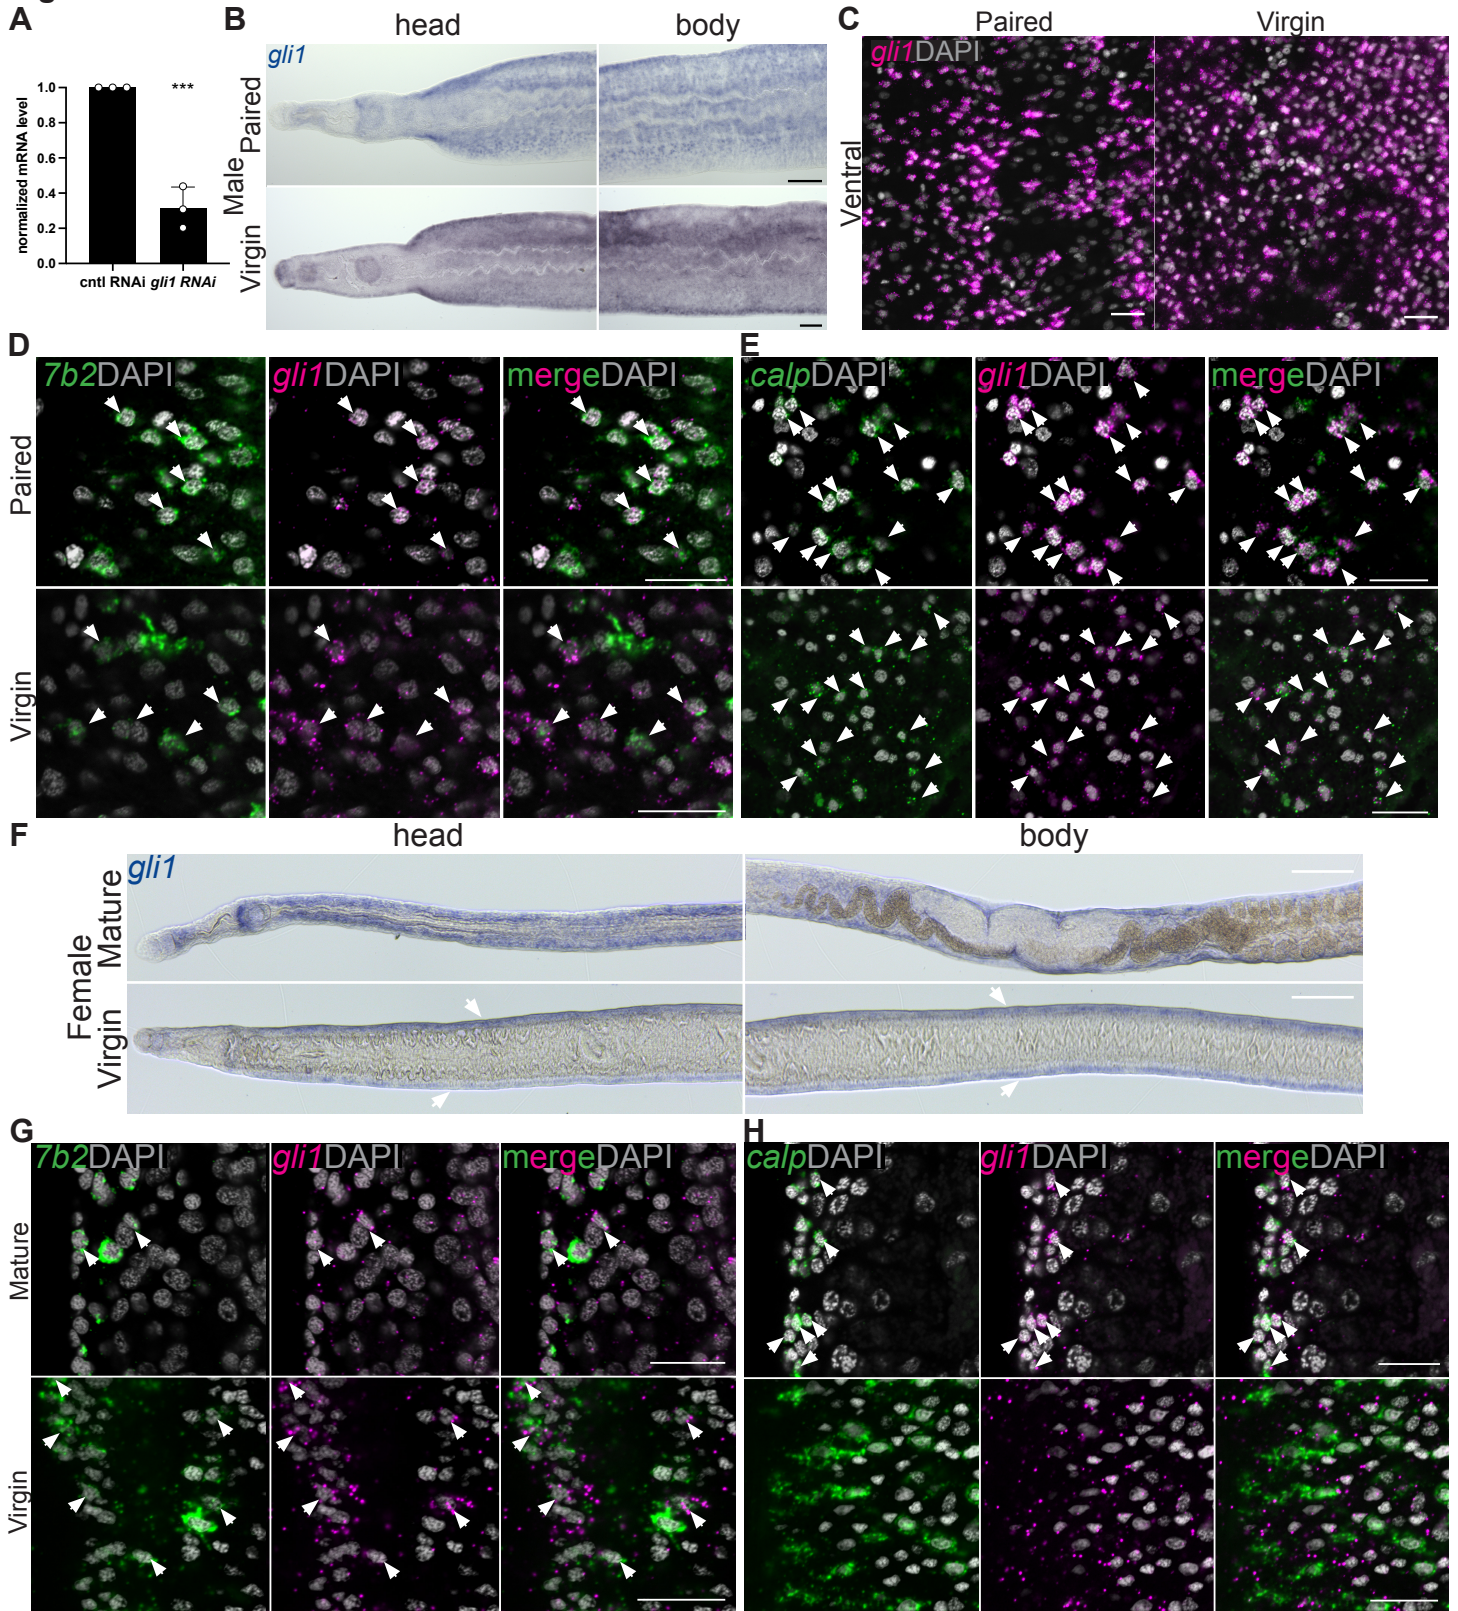

Supplement: NIHMS1789174-supplement-1.pdf [file NIHMS1789174-supplement-1.pdf]

**Figure S2**

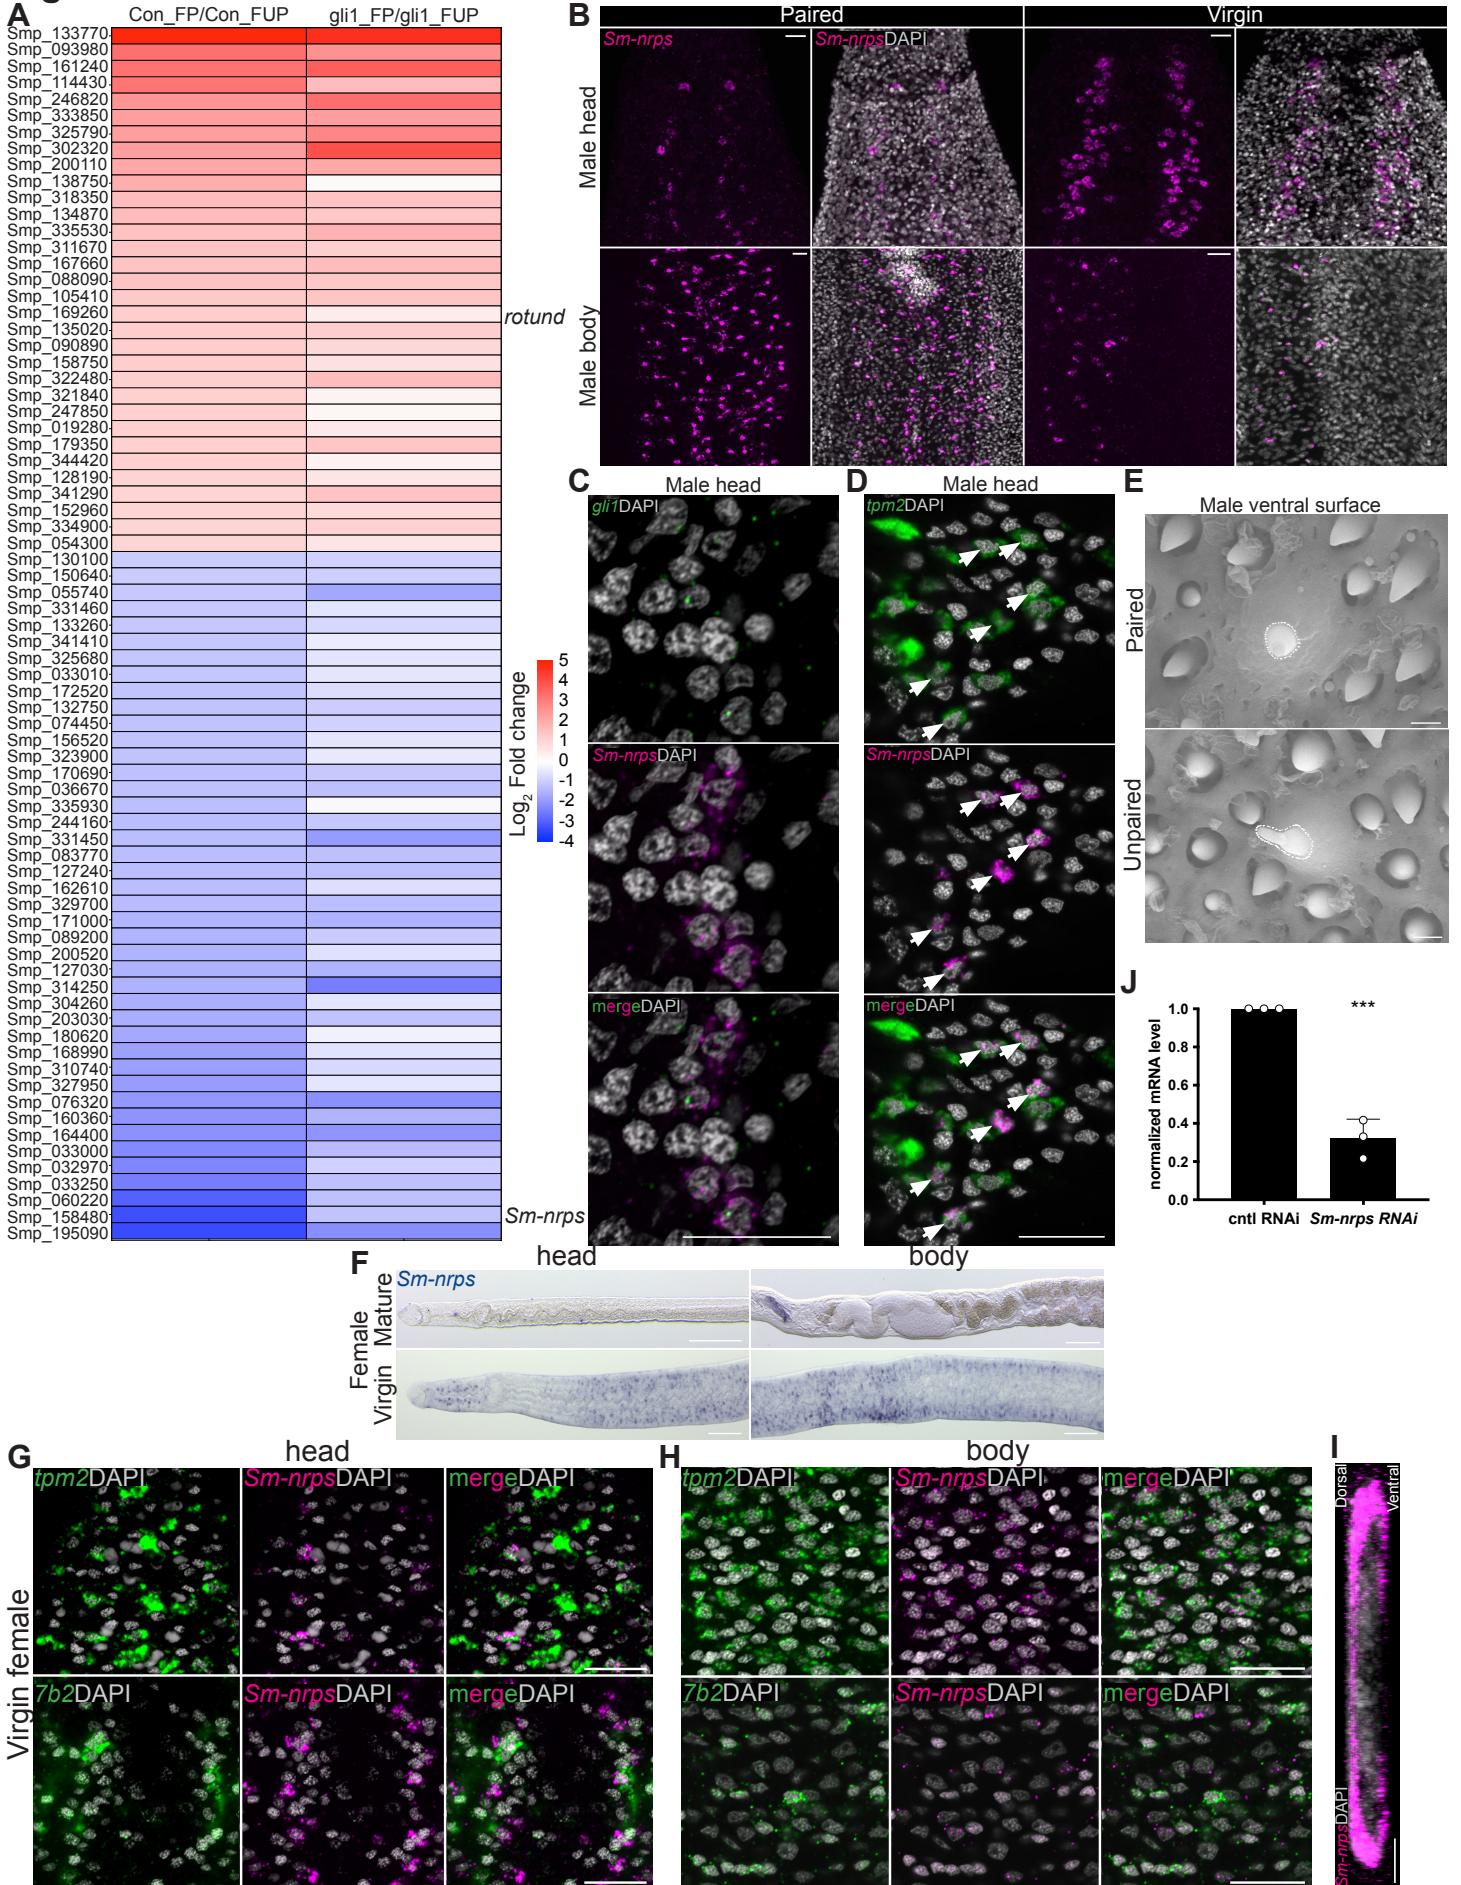

Supplement: NIHMS1789174-supplement-2.pdf [file NIHMS1789174-supplement-2.pdf]

**Figure S4**

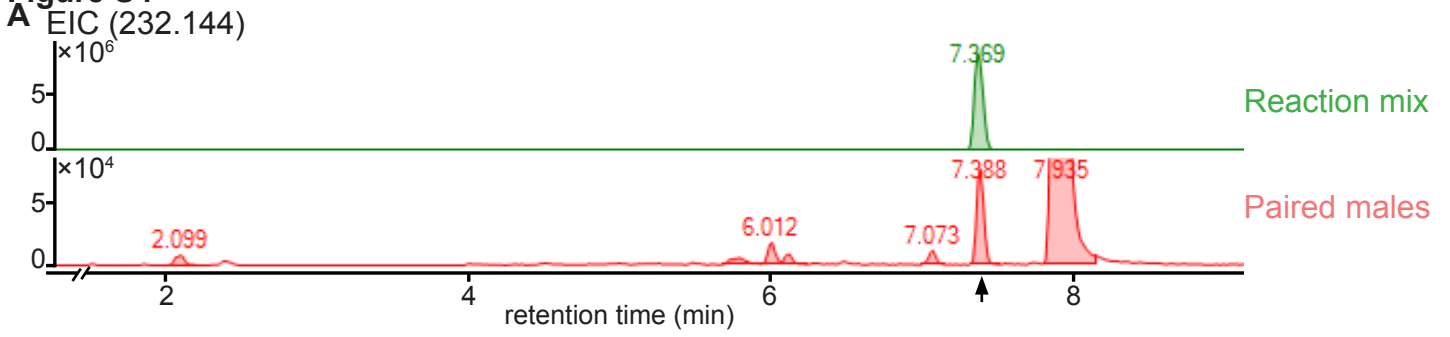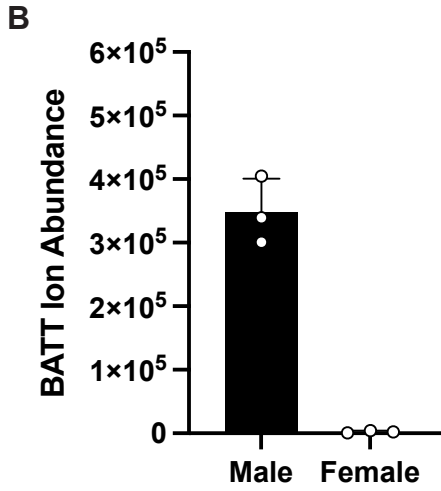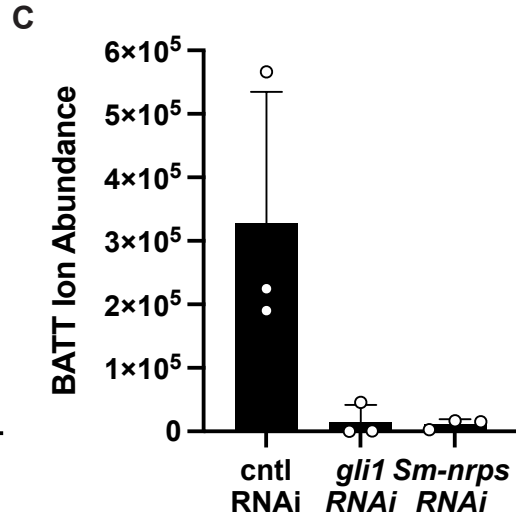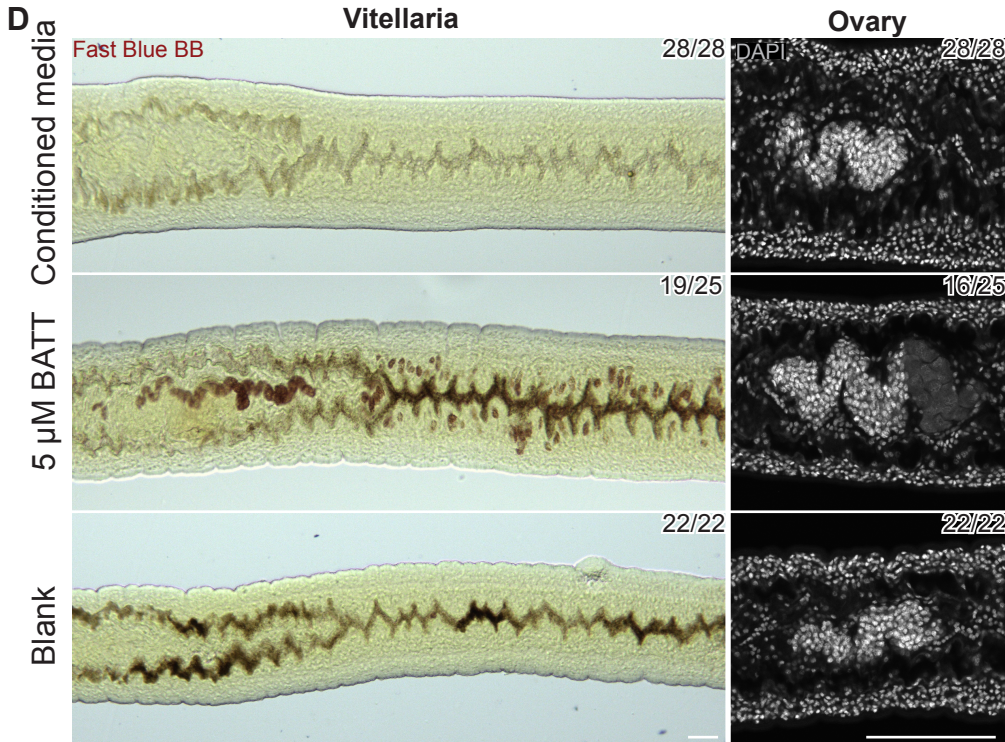

Supplement: NIHMS1789174-supplement-4.pdf [file NIHMS1789174-supplement-4.pdf]

Figure S5

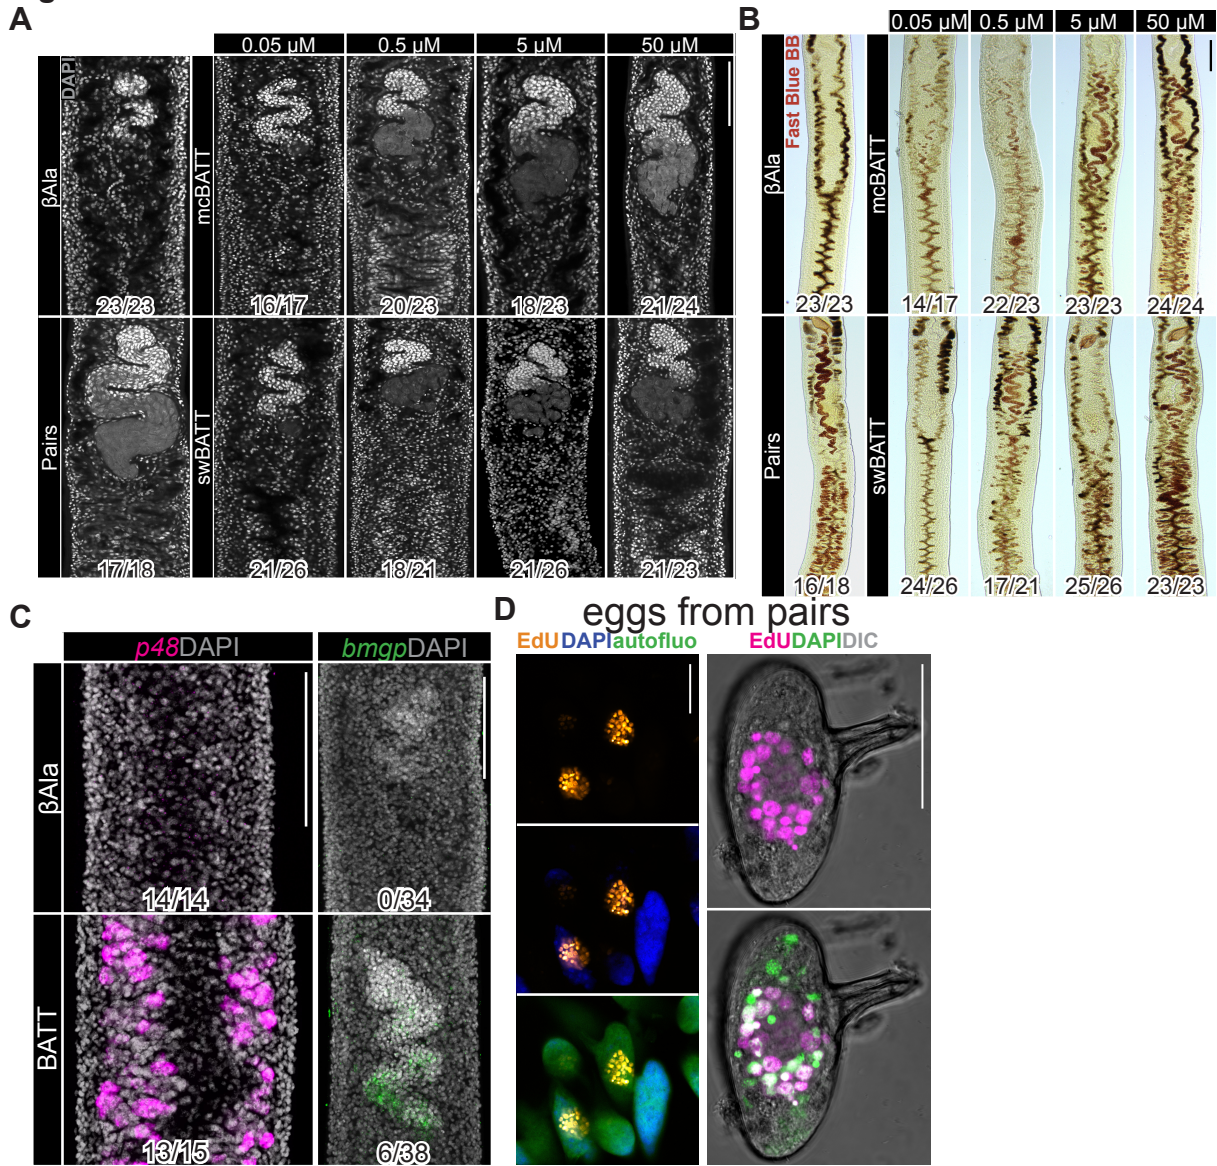

Supplement: NIHMS1789174-supplement-5.pdf [file NIHMS1789174-supplement-5.pdf]

**Figure S6**  
**A**

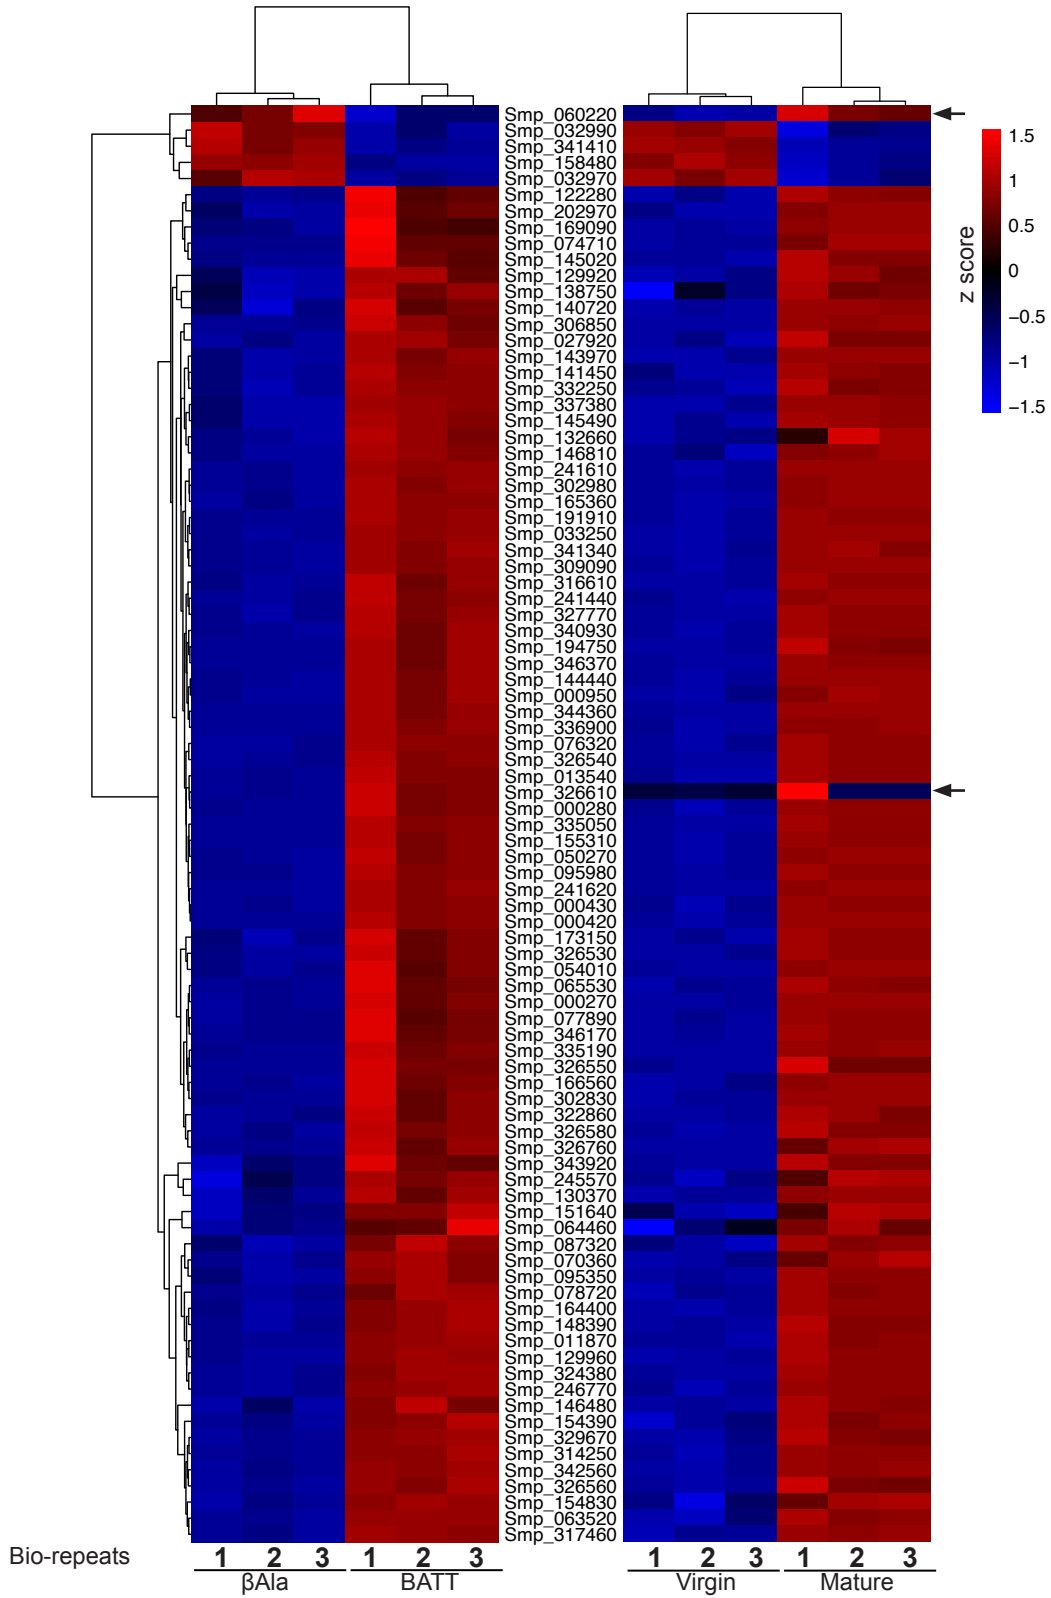

**B**

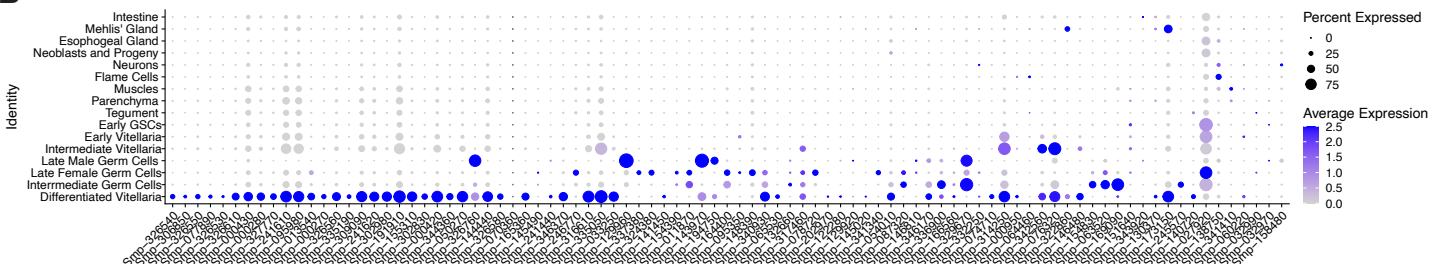

Supplement: NIHMS1789174-supplement-6.pdf [file NIHMS1789174-supplement-6.pdf]
